# Supplementary material for: Long Non-Coding RNA TMEM220-AS1 Suppressed Hepatocellular Carcinoma by Regulating the miR-484/MAGI1 Axis as a Competing Endogenous RNA
Source: Research Square preprint supplement (doi:10.21203/rs.3.rs-88668/v1), 2020-10-09
Supplement: Supplementary file 2 [file f40e7ee6f256c0e20747becc.docx]

**Supplementary Table 1.****Sequences of primers for qRT-PCR related sequence**

| **Name** |  | | **Sequence** |
| --- | --- | --- | --- |
| TMEM220-AS1 | | Forward | 5’- AGCTTCCACTCTTGTCTCCC-3’ |
| Reverse | 5’- TGAGCAGTGATGGAGCAGAA -3’ |
| miR-484 | | Forward | 5'-ACACTCCAGCTGGGUAGCCCUCCCCUGACU-3' |
| Reverse | 5'-CTCAACTGGTGTCGTGGAGTCGGCAATTCAGTTG  AGAGTCCGAG-3' |
| MAGI1 | | Forward | 5'- GAACAAGGACCTGCGACATTT -3' |
| Reverse | 5'- ACAGCATGGCGGTAAAGGTTA -3' |
| E-cadherin | | Forward | 5’- GCTGGACCGAGAGAGTTTCC -3’ |
| Reverse | 5’- CAAAATCCAAGCCCGTGGTG -3’ |
| Vimentin | | Forward | 5'- CGGGAGAAATTGCAGGAGGA -3' |
| Reverse | 5'-AAGGTCAAGACGTGCCAGAG-3' |
| Snail | | Forward | 5'-TCGGAAGCCTAACTACAGCGA-3' |
| Reverse | 5'-AGATGAGCATTGGCAGCGAG-3' |
